# Supplementary material for: Effect of H2SiF6 modification of IM-5 on catalytic performance in benzene alkylation with ethylene
Source: Royal Society of Chemistry journal article supplement (doi:10.1039/d1ra02427b), 2021-01-01
Supplement: d1ra02427b1.pdf [file d1ra02427b1.pdf]

ARTICLE

## Effect of $\text{H}_2\text{SiF}_6$ modification of IM-5 on catalytic performance in benzene alkylation with ethylene

Yunping Zhai, Junwen Chen, \*Yongrui Wang, Yibin Luo and Xingtian Shu

Received 00th January 20xx,  
Accepted 00th January 20xx

DOI: 10.1039/x0xx00000x

### Figures

Fig.S1 Variation of HF and carbon deposition rate with  $\text{Si}/\text{Al}_2$  ratio of IM-5 samples

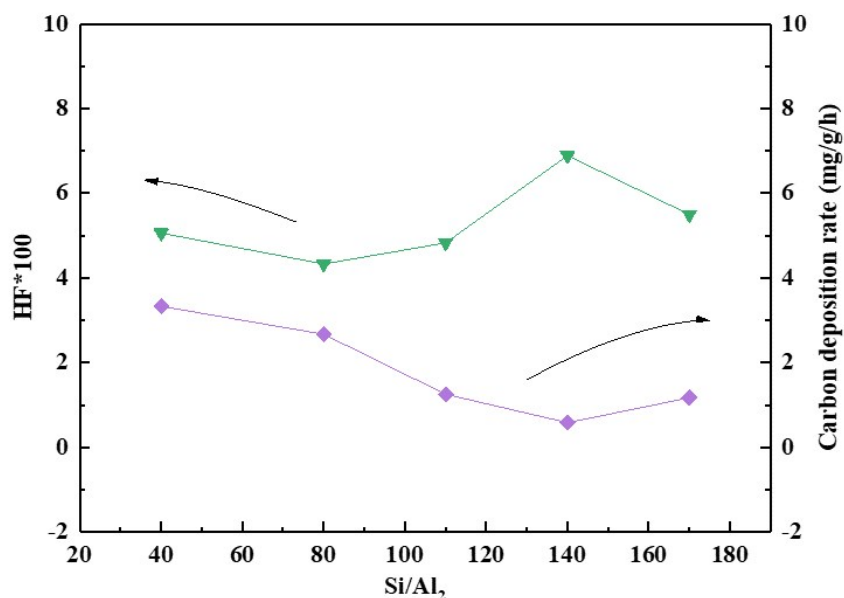

Fig.S1 Variation of HF and carbon deposition rate with  $\text{Si}/\text{Al}_2$  ratio of IM-5 samples

<sup>a</sup> State Key Laboratory of Catalytic Material and Reaction Engineering, Research Institute of Petroleum Processing, Sinopec, Beijing 100083, China.

† Email: wangyr.ripp@sinopec.com
